# Supplementary material for: Novel pH-responsive pectin-based hybrid smart hydrogels for in vitro drug release and in vivo wound healing applications
Source: Royal Society of Chemistry journal article supplement (doi:10.1039/d5ra08329j), 2026-01-01
Supplement: d5ra08329j1.pdf [file d5ra08329j1.pdf]

## **Supplementary data**

### **Novel pH Responsive Pectin-Based Hybrid Smart Hydrogels for In-Vitro Drug Release and In-Vivo Wound Healing Applications**

Hirra Manzoor, Nasima Arshad\*, Muhammad A.U.R. Qureshi, Sher Qadar,

*Department of Chemistry Allama Iqbal Open University, Islamabad, Pakistan*

---

***\*Corresponding author,***

Nasima Arshad (PhD), Associate Professor (Physical Chemistry)

Email: [nasimaa2006@yahoo.com](mailto:nasimaa2006@yahoo.com); [nasima.arshad@aiou.edu.pk](mailto:nasima.arshad@aiou.edu.pk)

<https://orcid.org/0000-0002-4257-9909>

## Graphene Oxide (GO) Characterization

FTIR spectrum of GO is shown in Fig. S1 (a). A prominent and wide -OH stretching peak was seen at roughly  $3154\text{ cm}^{-1}$ , indicating that the produced GO contained hydroxyl groups. The strong C=O stretching peak was also detected at  $1740\text{ cm}^{-1}$ , while the existence of C=C and C-O-C (epoxy) groups is indicated by the peaks at  $1576\text{ cm}^{-1}$  and  $1051\text{ cm}^{-1}$ , respectively. The peak at  $1316\text{ cm}^{-1}$  exhibits C-O stretching bond [1].

The graphene oxide thermogram, shown in Fig. S1 (b), reflected three-step decomposition. Up to  $100\text{ }^{\circ}\text{C}$ , the elimination of bound water is thought to be responsible for the early deterioration in GO. In phase two, 22.27% of GO was broken down. For the second phase, oxygen-containing functionalities (-COOH, -OH, -C=O) are responsible for rapid breakdown between the temperature range of  $100$  to  $250\text{ }^{\circ}\text{C}$ . In the third step, a gradual decrease in weight was seen at temperatures between  $250$  to  $700\text{ }^{\circ}\text{C}$ . The thermally stable graphitic part was confirmed to exist by this third stage of disintegration, which was decomposed completely upto the temperature of  $700\text{ }^{\circ}\text{C}$  [2].

Fig. S1 (c) displays the XRD results of Graphene oxide (GO). GO showed a strong and intense XRD peak at a  $2\theta$  value of  $12.09^{\circ}$ , which corresponded to the (001) with an interplanar spacing of  $0.74\text{ nm}$ . The presence of reactive functional groups with oxygen was confirmed by the increase in interplanar spacing of graphene oxide ( $0.74\text{ nm}$ ) as compared to that of pure graphite ( $0.335\text{ nm}$ ).  $26^{\circ}$  peak shows interlayer stacking of graphene sheets and  $43^{\circ}$  confirms in plane structure of graphene sheets. This confirms the oxidation of graphite to graphene oxide [3].

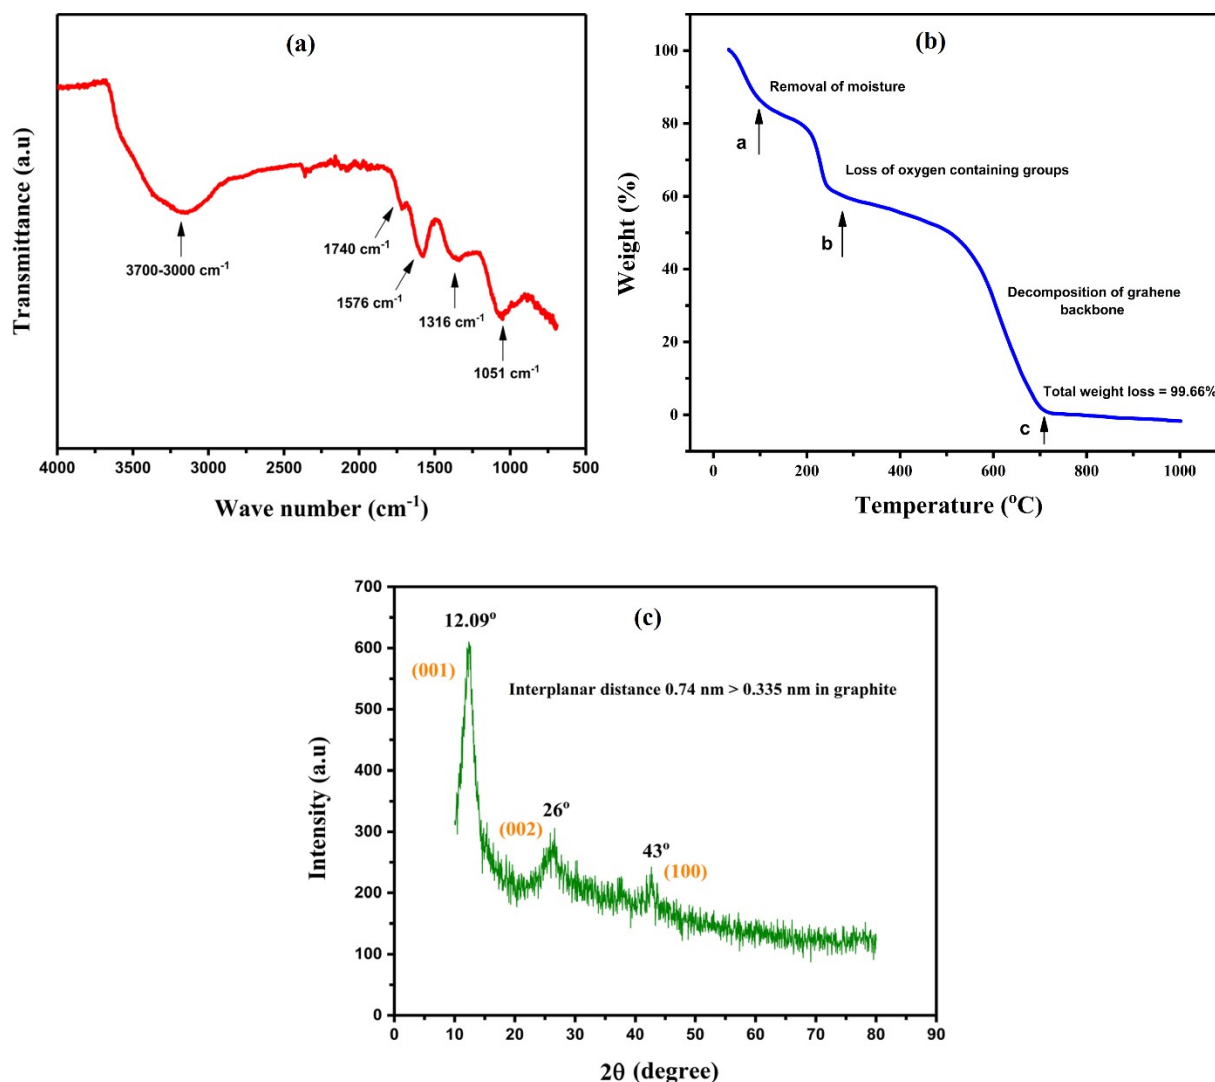

**Fig. S1.** (a) FTIR spectrum (b) TGA thermogram and (c) XRD spectra of graphene oxide.

## References

- [1] P. Viprya, D. Kumar & S. Kowshik, Study of different properties of graphene oxide (GO) and reduced graphene oxide (rGO), Eng. Proc. 59(1) (2023) 84. <https://doi.org/10.3390/engproc2023059084>
- [2] D. Losic, F. Farivar & P. L. Yap, Refining and Validating Thermogravimetric Analysis (TGA) for Robust Characterization and Quality Assurance of Graphene-Related Two-

Dimensional Materials (GR2Ms), C- J. Carbon Res. 10(2) (2024) 30.  
<http://dx.doi.org/10.3390/c10020030>

- [3] S. M. Alduwaib & M. M. Abd, Investigating the Structural, Optical and Antibacterial Properties of Go, Go: Ag, GO: ZnO Thin Layers and Go: ZnO/GO: Ag Bilayers Synthesized by Spray Pyrolysis Method. Iran. J. Mater. Sci. Eng. 17(4) (2020) 170.  
<http://dx.doi.org/10.22068/ijmse.17.4.170>

**Table S1**

Residual weight of GO reinforced Pectin/PVA/APTES/GO hydrogels in PBS solution with respect to time.

| Time (days) | Weight (mg)   |         |       |         |        |
|-------------|---------------|---------|-------|---------|--------|
|             | PPG (control) | PPG-2.5 | PPG-5 | PPG-7.5 | PPG-10 |
| 0           | 30            | 30      | 30    | 30      | 30     |
| 1           | 19.02         | 22.21   | 23.5  | 25.17   | 26.33  |
| 3           | 9.98          | 13.46   | 16.5  | 15.38   | 17.86  |
| 7           | 8.17          | 10.99   | 12.11 | 13.29   | 15     |
| 10          | 6.22          | 9.05    | 9.86  | 11.47   | 12.73  |
| 14          | 4.08          | 6.36    | 8.14  | 9.19    | 10.05  |
| 21          | 2.06          | 3.28    | 4.54  | 5.02    | 6.6    |

**Table S2**

Residual weight of GO reinforced Pectin/PVA/APTES/GO hydrogels in Proteinase-K solution with respect to time.

| Time (days) | Weight (mg)   |         |       |         |        |
|-------------|---------------|---------|-------|---------|--------|
|             | PPG (control) | PPG-2.5 | PPG-5 | PPG-7.5 | PPG-10 |
| 0           | 30            | 30      | 30    | 30      | 30     |
| 1           | 9.7           | 12.59   | 12    | 14.40   | 16.88  |
| 3           | 5.11          | 6.73    | 8.5   | 11.34   | 12.16  |
| 7           | 2.20          | 3.42    | 4.59  | 5.10    | 6.27   |

**Table S3**

Drug release data of GO reinforced Pectin/PVA/APTES/GO hydrogel in PBS solution at pH 7.4.

| Time (mins) | Concentration (mg) | Drug release (%) | Square root of T | $M_t/M_0$ | Log T | Log release drug |
|-------------|--------------------|------------------|------------------|-----------|-------|------------------|
| 10          | 12.234             | 24.469           | 3.162            | 0.244     | 1.000 | 1.388            |
| 20          | 15.967             | 31.934           | 4.472            | 0.319     | 1.301 | 1.504            |
| 30          | 18.552             | 37.104           | 5.477            | 0.371     | 1.477 | 1.569            |
| 40          | 21.031             | 42.063           | 6.324            | 0.420     | 1.602 | 1.623            |
| 50          | 22.812             | 45.624           | 7.071            | 0.456     | 1.698 | 1.659            |
| 60          | 24.988             | 49.977           | 7.745            | 0.499     | 1.778 | 1.698            |
| 70          | 26.452             | 52.905           | 8.366            | 0.529     | 1.845 | 1.723            |
| 80          | 28.945             | 57.890           | 8.944            | 0.578     | 1.903 | 1.762            |
| 90          | 30.409             | 60.818           | 9.486            | 0.608     | 1.954 | 1.784            |
| 100         | 32.110             | 64.221           | 10.00            | 0.642     | 2.000 | 1.807            |
| 110         | 33.522             | 67.044           | 10.488           | 0.670     | 2.041 | 1.826            |
| 120         | 35.988             | 71.976           | 10.954           | 0.719     | 2.079 | 1.857            |
| 130         | 37.043             | 74.087           | 11.401           | 0.740     | 2.113 | 1.869            |
| 140         | 39.496             | 78.993           | 11.832           | 0.789     | 2.146 | 1.897            |
| 150         | 40.947             | 81.895           | 12.247           | 0.818     | 2.176 | 1.913            |
| 160         | 41.725             | 83.451           | 12.649           | 0.834     | 2.204 | 1.921            |
| 170         | 43.057             | 86.115           | 13.038           | 0.861     | 2.230 | 1.935            |
| 180         | 43.453             | 86.906           | 13.416           | 0.869     | 2.255 | 1.939            |
| 190         | 43.572             | 87.144           | 13.784           | 0.871     | 2.278 | 1.940            |
| 200         | 45.049             | 90.098           | 14.142           | 0.900     | 2.301 | 1.954            |
| 210         | 45.721             | 91.443           | 14.491           | 0.914     | 2.322 | 1.961            |
| 220         | 45.721             | 91.443           | 14.832           | 0.914     | 2.342 | 1.961            |
| 230         | 45.721             | 91.443           | 15.165           | 0.914     | 2.361 | 1.961            |

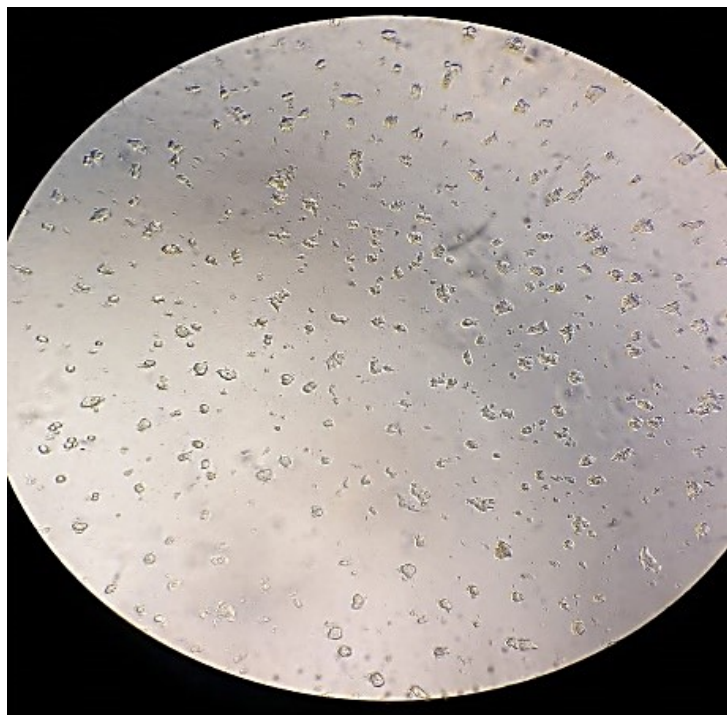

**Fig. S2.** Picture of cell viability analysis of the Reference.

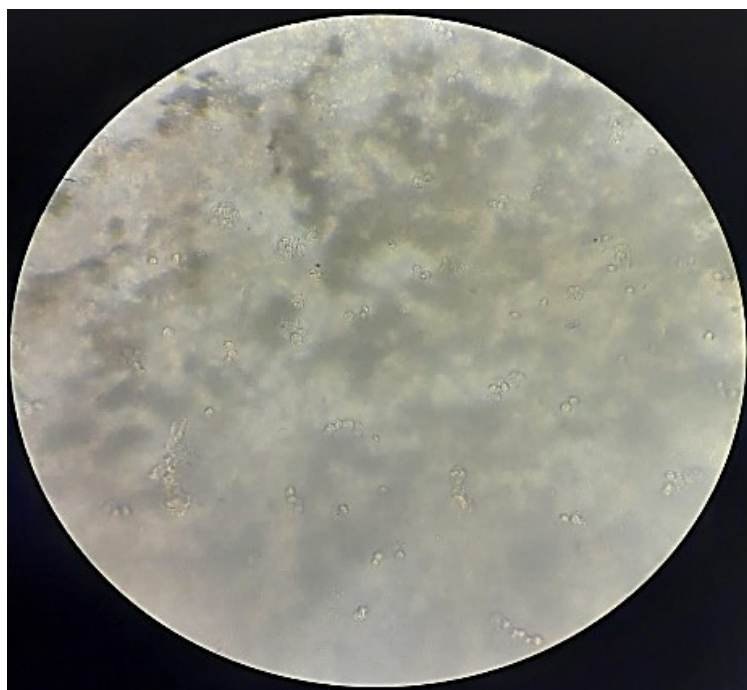

**Fig. S3.** Picture of cell viability analysis of PPG (control).

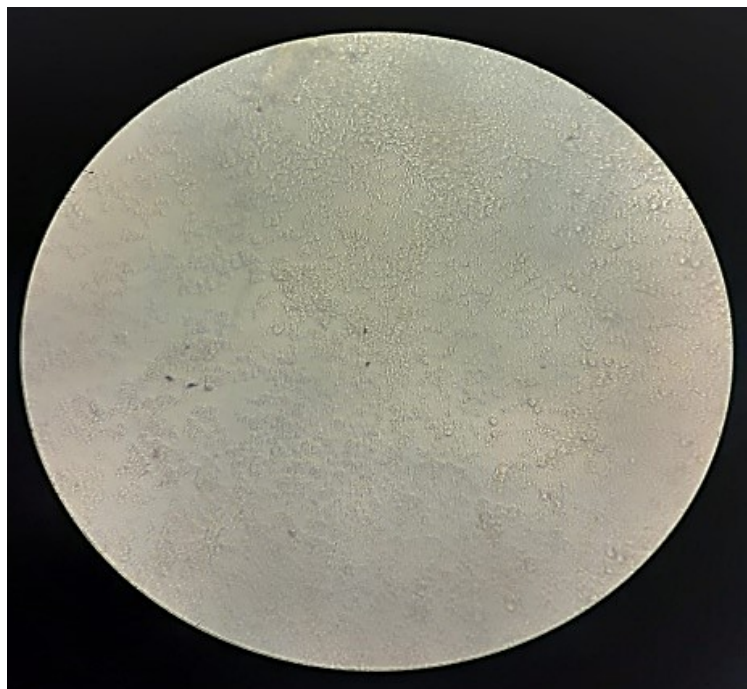

**Fig. S4.** Picture of cell viability analysis of PPG-2.5.

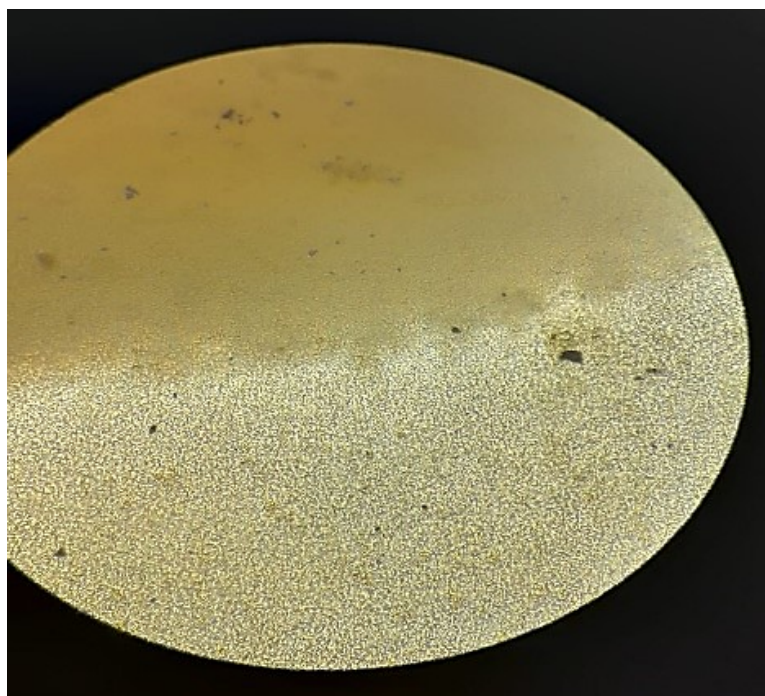

**Fig. S5.** Picture of cell viability analysis of PPG-5.



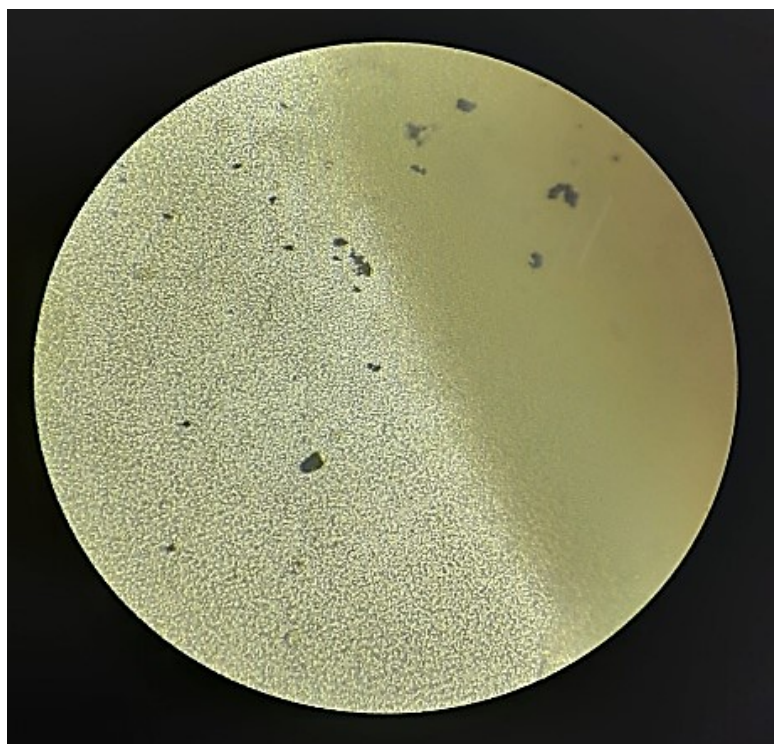

**Fig. S6.** Picture of cell viability analysis of PPG-7.5.

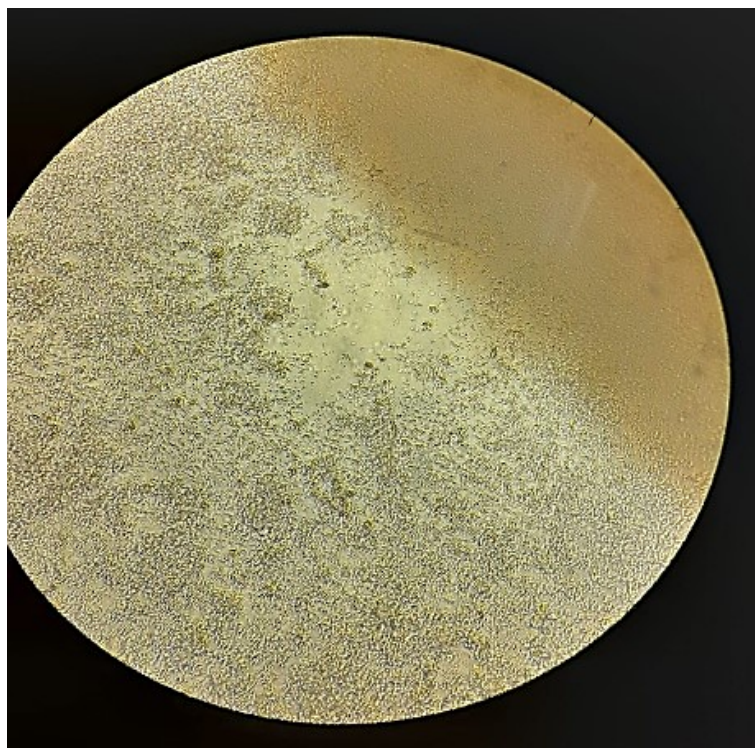

**Fig. S7.** Picture of cell viability analysis of PPG-10.
